# Supplementary material for: Gelatinase Responsive Nanogel for Antibacterial Phototherapy and Wound Healing
Source: MDPI journal article supplement (doi:10.3390/gels8070397), 2022-06-23
Supplement: s1 [file s1]

## Article

# Gelatinase Responsive Nanogel for Antibacterial Phototherapy and Wound Healing

Qianqian Han <sup>1,†</sup>, Xuan Wang <sup>1,†</sup>, Lin Qiu <sup>1,†</sup>, Xinpei Zhou <sup>1</sup>, Zexuan Hui <sup>1</sup>, Xinye Ni <sup>2,\*</sup>, Yang Xuan <sup>3</sup>, Xiaoling Lei <sup>4</sup> and Jianhao Wang <sup>1,\*</sup>

<sup>1</sup> School of Pharmacy, Changzhou University, Changzhou 213164, China; 200817z1018@smail.cczu.edu.cn (Q.H.); 19085235788@smail.cczu.edu.cn (X.W.); linqiu@cczu.edu.cn (L.Q.); 19479125@smail.cczu.edu.cn (X.Z.); 19479127@smail.cczu.edu.cn (Z.H.)

<sup>2</sup> The Affiliated Changzhou No. 2 People's Hospital of Nanjing Medical University, Changzhou 213003, China

<sup>3</sup> Key Lab of Biotechnology and Bioresources Utilization of Ministry of Education, College of Life Science, Dalian Minzu University, Dalian 116600, China; xuanyang@dlmu.edu.cn

<sup>4</sup> College of Life Science and Technology, Huazhong University of Science and Technology, Wuhan 430074, China; d202180741@hust.edu.cn

\* Correspondence: nxy@njmu.edu.cn (X.N.); minuswan@cczu.edu.cn (J.W.)

† These authors contributed equally to this work.

## Supplementary Materials

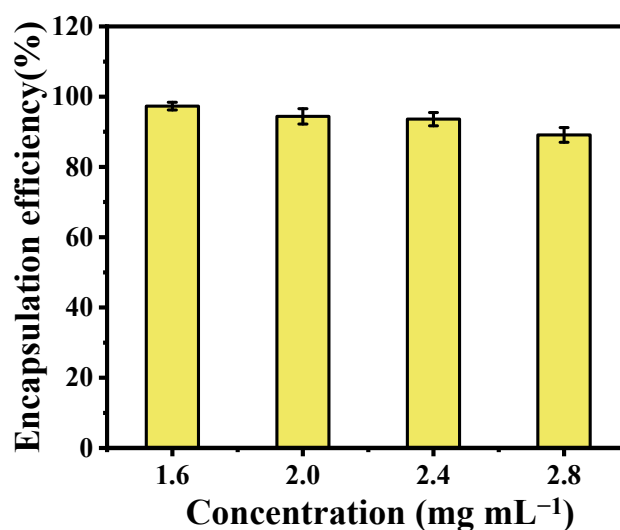

**Figure S1.** Encapsulation efficiency (EE) of CuS NDs in Gel.

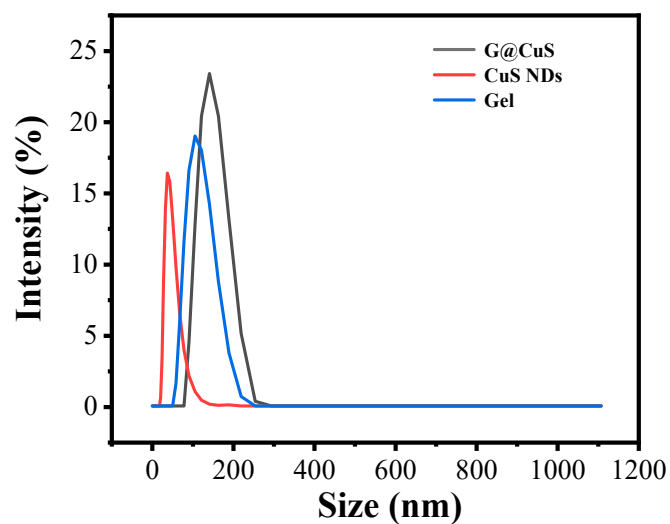

Figure S2. Particle sizes of the G@CuS, CuS NDs and Gel.

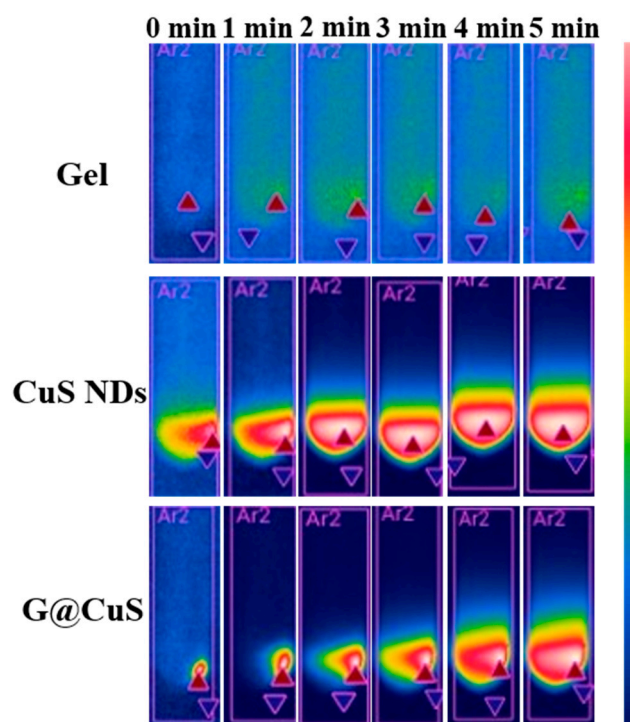

Figure S3. Photothermal images of Gel, CuS NDs and G@CuS under NIR (808 nm,  $1.8 \text{ W cm}^{-2}$ ) irradiation.

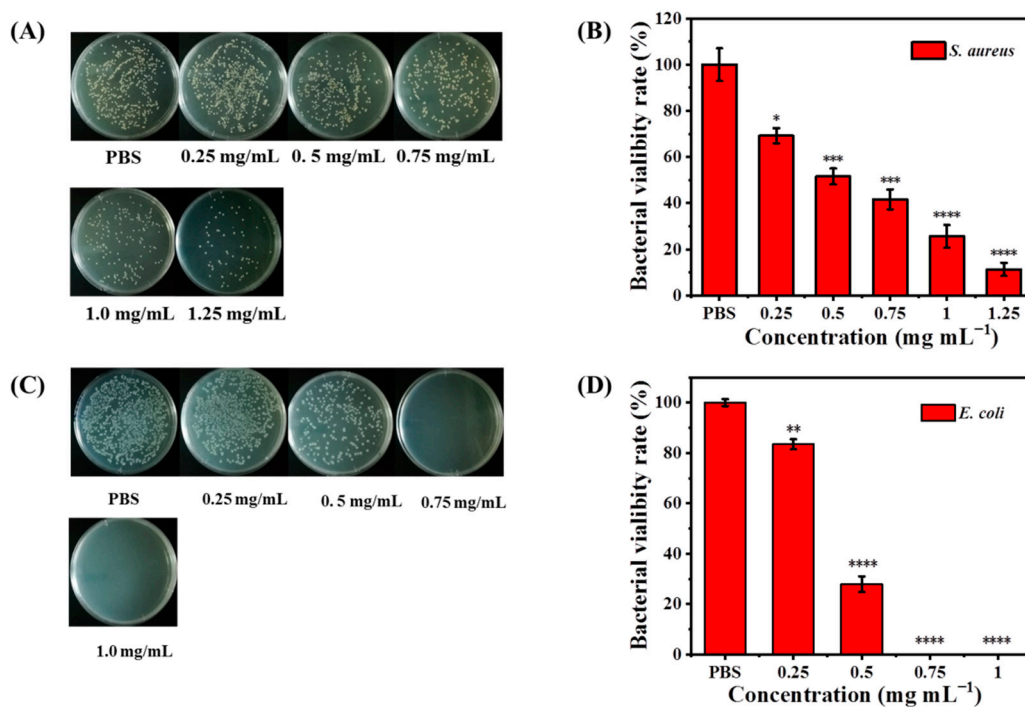

**Figure S4.** *In vitro* antibacterial activity of the CuS NDs. Colony images (A) and a statistical chart (B) of *S. aureus* incubated with different concentrations of the CuS NDs. Colony images (C) and a statistical chart (D) of *E. coli* incubated with different concentrations of the CuS NDs. (n=3; \*p < 0.05, \*\*p < 0.01, \*\*\*p < 0.001, \*\*\*\*p < 0.0001).

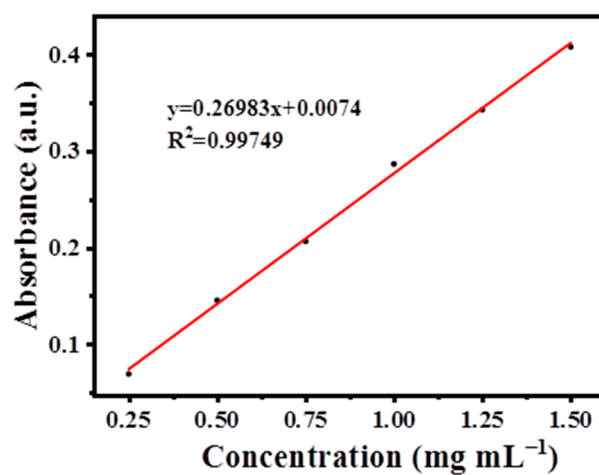

**Figure S5.** The linear calibration curve between the CuS NDs concentration and its absorbance.

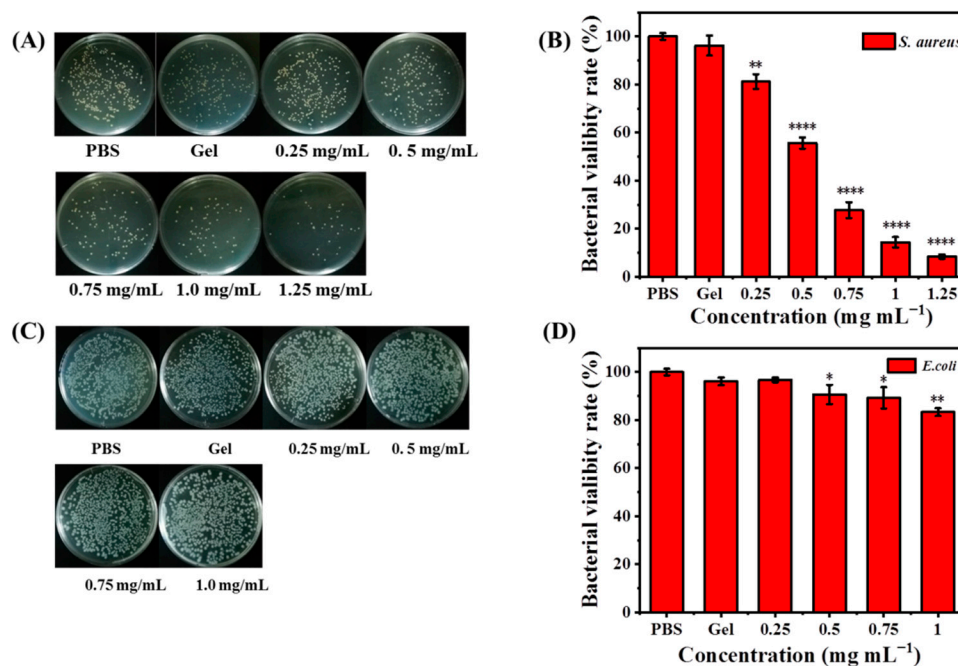

**Figure S6.** *In vitro* antibacterial activity of the G@CuS. Colony images (A) and a statistical chart (B) of *S. aureus* incubated with different concentrations of the G@CuS. Colony images (C) and a statistical chart (D) of *E. coli* incubated with different concentrations of the G@CuS. (n=3; \*p < 0.05, \*\*p < 0.01, \*\*\*\*p < 0.0001).

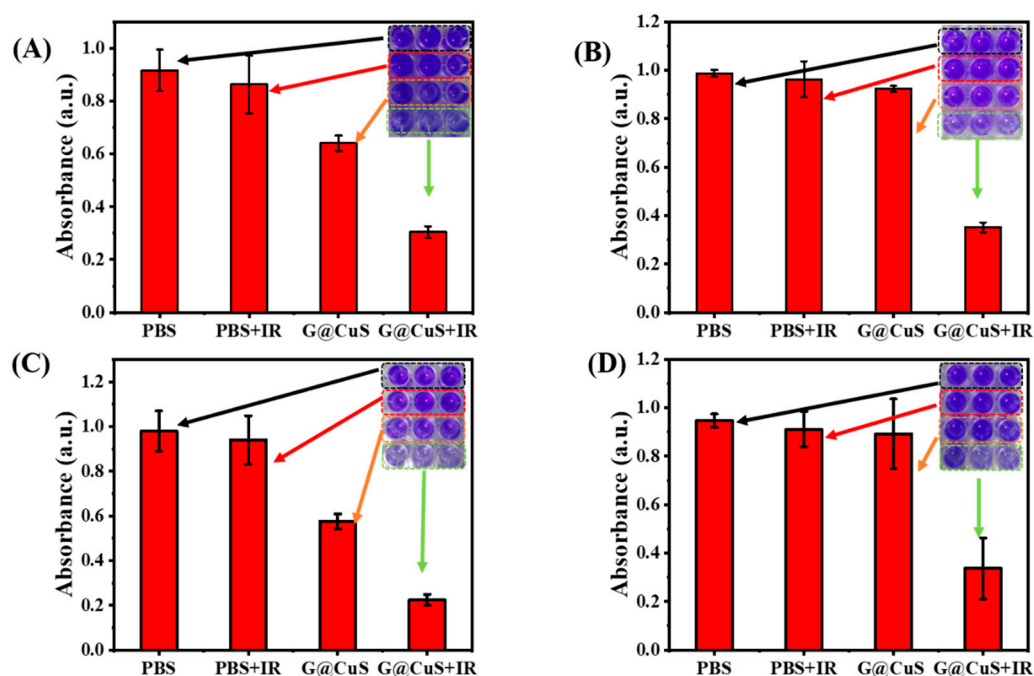

**Figure S7.** Anti-biofilm activity of the G@CuS before and after NIR laser (808 nm, 1.8 W cm<sup>-2</sup>, 5 min) irradiation. Crystal violet staining images and its corresponding absorbance for inhibiting *S. aureus* (A) and *E. coli* (B) biofilms before and after NIR laser irradiation. Crystal violet staining images and its corresponding absorbance for destroying *S. aureus* (C) and *E. coli* (D) biofilms before and after NIR laser irradiation.

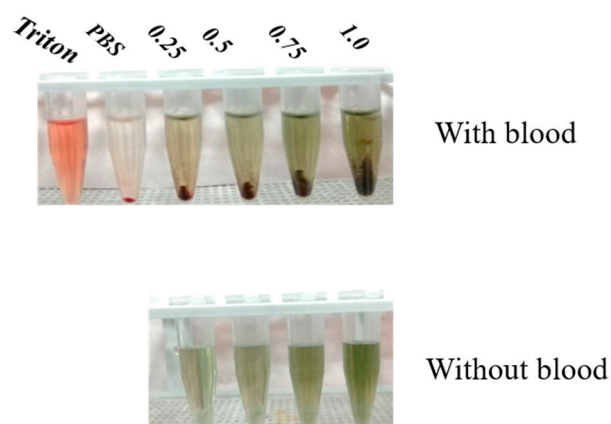

**Figure S8.** Images of red blood cells incubated with different concentrations of the CuS NDs.

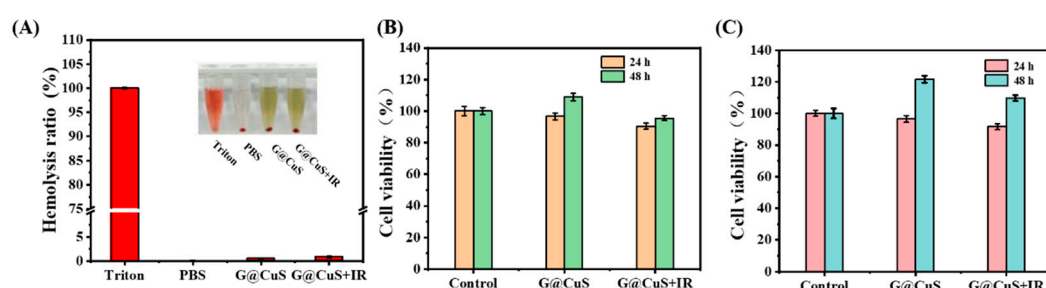

**Figure S9.** Effects of NIR (808 nm,  $1.8 \text{ W cm}^{-2}$ , 5 min) irradiation on biocompatibility. (A) Hemolysis ratio and images of red blood cells incubated with the G@CuS ( $0.75 \text{ mg mL}^{-1}$ ) before and after NIR laser (808 nm,  $1.8 \text{ W cm}^{-2}$ , 5 min) irradiation. Cytotoxicity of the G@CuS ( $0.75 \text{ mg mL}^{-1}$ ) incubated with L929s (B) and HUVECs (C) before and after NIR laser (808 nm,  $1.8 \text{ W cm}^{-2}$ , 5 min) irradiation.

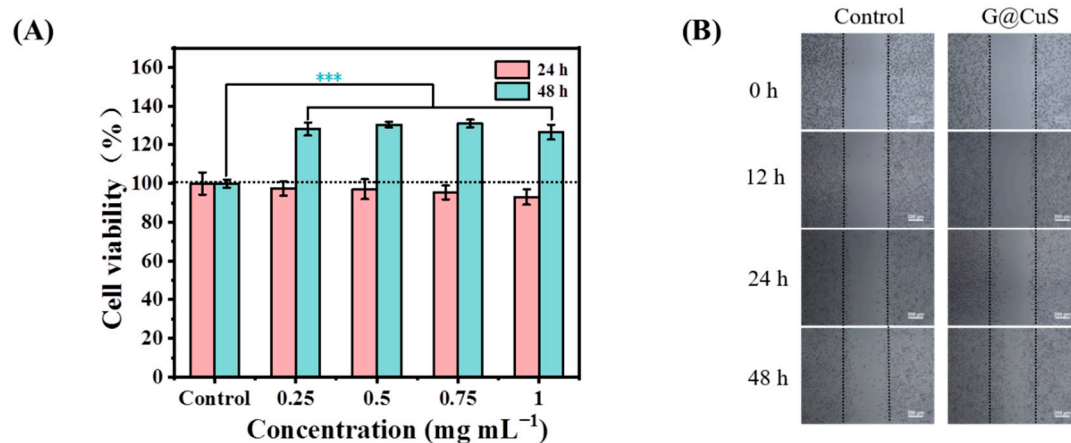

**Figure S10.** Promoting effect of G@CuS on cells proliferation and migration. (A) L929s viability after the treatment of G@CuS for 24 and 48 h. (B) Photographs of L929s migration at different times. (n=3; \*\*\* $p < 0.001$ ).

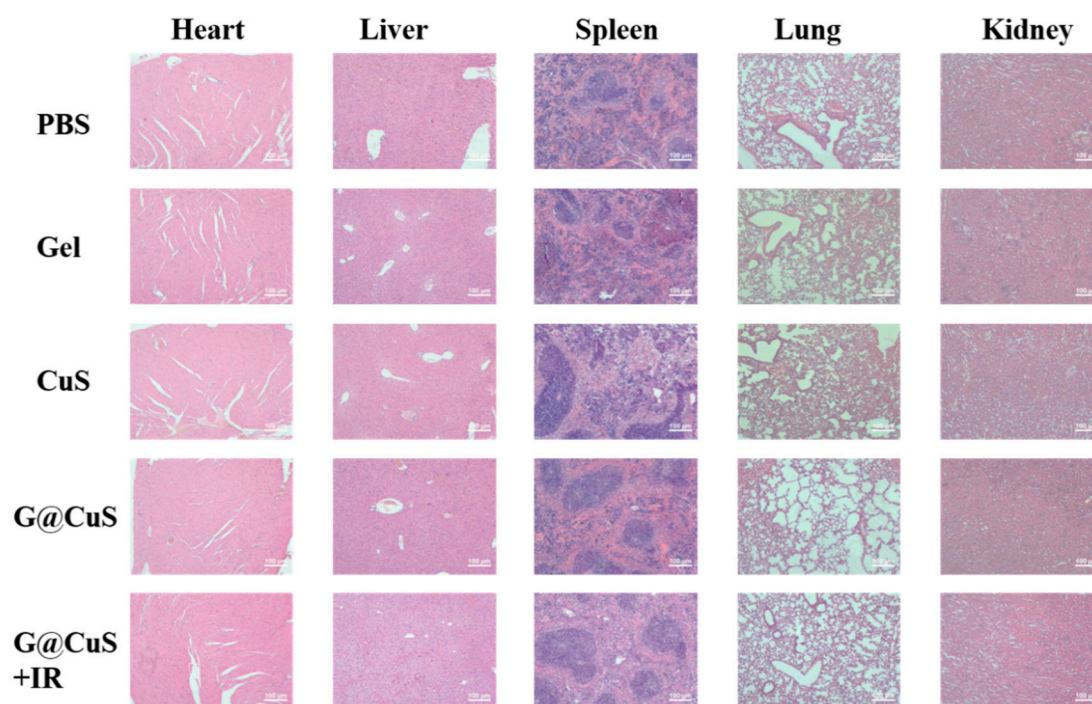

**Figure S11.** H&E staining images of major organs (heart, liver, spleen, lung and kidney) of mice in each treatment group.
